# Supplementary material for: A prognostic risk model for programmed cell death and revealing TRIB3 as a promising apoptosis suppressor in renal cell carcinoma
Source: Aging (Albany NY). 2023 Nov 22;15(22):13213–38. doi: 10.18632/aging.205237 (PMC10713411; doi:10.18632/aging.205237)
Supplement: Supplementary Table 1 [file aging-15-205237-s002.xlsx]

## Sheet: Sheet1
Supplementary Table 1. The list of genes related to PCD.
Apoptosis	Pyroptosis	Ferroptosis	Autophagy	Necroptosis	Cuproptosis	Parthanatos	Entotic cell death	Netotic cell death	Lysosome-dependent cell death	Alkaliptosis	Oxciptosis	Anoikis
AATF	BAK1	ABCC1	ABL1	GLUD1	FDX1	PARP	AMPK	ELANE	ABCA2	IKBKB	PGAM5	AKT1
ABL1	BAX	ACACA	ABL2	GLUD2	LIAS	MIF	ATG5	MMP1	ABCB9	NFKB1	KEAP1	ANKRD13C
ACAA2	CASP1	ACO1	ACER2	ALOX15	LIPT1	AIFM1	ATG7	MPO	ACP2	CA9	AIFM1	BCL2
ACKR3	CASP3	ACSF2	ADRA1A	FTH1	DLD	HSP70	BECN1	CAMP	ACP5	CHUK	NRF2	BMF
ACVR1	CASP4	ACSL1	ADRB2	PYG	DLAT	PAAN	CDC42	PADI4	ADGRE2	IKBKG	AIRE	BRMS1
ACVR1B	CASP5	ACSL3	AKT1	CAPN1	PDHA1	ARH3	CDH1	EIPA	AGA	NFKBIA		CAV1
ADORA1	CASP6	ACSL4	AMBRA1	CASP1	PDHB	RNF146	CTNNA1	NCX1	AP1B1	RELA		CEACAM5
AEN	CASP8	ACSL5	ATF6	GLNA	MTF1	ADPRHL2	CYBB	MIA	AP1G1			CEACAM6
AGT	CASP9	ACSL6	ATG101	BAX	GLS	OGG1	MYH14		AP1M1			CHEK2
AGTR2	CHMP2A	AIFM2	ATG13	BCL2	CDKN2A		PI3KC3		AP1M2			CRYBA1
AIFM1	CHMP2B	AKR1C1	ATG14	FADD	GCSH		RHOA		AP1S1			DAPK2
AKT1	CHMP3	AKR1C2	ATG2A	RIPK1	ATP7A		RNF146		AP1S2			E2F1
ANXA6	CHMP4A	AKR1C3	ATG2B	TNF	ATP7B		ROCK		AP1S3			IKBKG
APAF1	CHMP4B	ALOX12	ATG5	TNFRSF1A	SLC31A1		RUBCN		AP3B1			ITGA5
APPL1	CHMP4C	ALOX15	ATG7	TRADD			UVRAG		AP3B2			ITGB1
AR	CHMP6	ALOX5	ATM	TRAF2					AP3D1			MAP3K7
ARHGEF2	CHMP7	ATG5	ATP13A2	PPIA					AP3M1			MCL1
ARL6IP5	CYCS	ATG7	ATP6V0A1	CAPN2					AP3M2			MTOR
ARMC10	ELANE	ATP5MC3	ATP6V0A2	HSP90A					AP3S1			MYBBP1A
ARRB2	GPX4	BACH1	ATP6V0B	IL1A					AP3S2			NOTCH1
ASAH2	GSDMB	CARS	ATP6V0C	TNFSF6					AP4B1			NTRK2
ATF3	GSDMC	CBS	ATP6V0D1	TNFRSF6					AP4E1			PDK4
ATF4	GSDMD	CD44	ATP6V0D2	CASP8					AP4M1			PIK3CA
ATM	GSDME	CHAC1	ATP6V0E1	JNK					AP4S1			PIK3R3
ATP2A1	GZMB	CISD1	ATP6V0E2	JAK2					ARF1			PTK2
ATP2A3	HMGB1	CP	ATP6V1A	CAMK2					ARL8B			PTRH2
ATP5IF1	IL18	CRYAB	ATP6V1B1	IL1B					ARSA			SIK1
AVP	IL1A	CS	ATP6V1B2	IFNG					ARSB			SNAI2
BAD	IL1B	CYBB	ATP6V1C1	STAT3					ARSG			SRC
BAG3	IRF1	DPP4	ATP6V1C2	IRF9					ASAH1			STK11
BAG5	IRF2	EMC2	ATP6V1D	TNFSF10					ATP10B			TFDP1
BAG6	NLRC4	FADS2	ATP6V1E1	TNFRSF10A					ATP13A2			TLE1
BAK1	NLRP1	FANCD2	ATP6VIE2	TNFRSF10B					ATP6AP1			TLE5
BAX	NLRP2	FDFT1	ATP6V1G1	CFLAR					ATP6V0A1			TSC2
BBC3	NLRP3	FTH1	ATP6V1G2	XIAP					ATP6V0A2			ZNF304
BCAP31	NLRP6	FTL	ATP6V1H	BID					ATP6V0A4
BCL10	NLRP7	FTMT	AUP1	AIFM1					ATP6V0B
BCL2	NOD1	G6PD	BAD	TRPM7					ATP6V0C
BCL2A1	PLCG1	GCLC	BAG3	IFNAR1					ATP6V0D1
BCL2L1	PJVK	GCLM	BCL2	IFNAR2					ATP6V0D2
BCL2L10	PRKACA	GLS2	BCL2L11	IFNGR1					ATP6V1H
BCL2L11	PYCARD	GOT1	BECN1	IFNGR2					BLK
BCL2L12	SCAF11	GPX4	BMF	TLR3					BLOC1S1
BCL2L14	TINAP	GSS	BNIP3	TIRP					BLOC1S2
BCL2L2	TNF	HMGCR	BNIP3L	IFNA					BORCS5
BCL3	TP53	HMOX1	BOK	IFNB					BORCS6
BCLAF1	TP63	HSBP1	C9orf72	TRIF					BTK
BDKRB2	AIM2	HSPB1	CALCOCO2	VDAC1					C12orf4
BDNF	GSDMA	IREB2	CAMKK2	SLC25A4S					CBL
BECN1	IL6	KEAP1	CAPN1	PPID					CD164
BID	NOD2	LPCAT3	CAPNS1	CYLD					CD300A
BIK	TIRAP	MAP1LC3A	CASP1	RIPK3					CD63
BIRC6		MAP1LC3B	CASP3	MLKL					CD68
BLOC1S2		MAP1LC3C	CDC37	TRAF5					CD84
BMF		MT1G	CDK5	TLR4					CHGA
BMP4		NCOA4	CDK5R1	RBCK1					CLN3
BMP5		NFE2L2	CHMP4A	HMGB1					CLN5
BMPR1B		NFS1	CHMP4B	JAK1					CLNK
BNIP3		NOX1	CISD2	JAK3					CLTA
BNIP3L		NQO1	CLEC16A	TYK2					CLTB
BOK		NRF2	CLN3	STAT1					CLTC
BRCA1		OTUB1	CLU	STAT2					CLTCL1
BRCA2		PCBP1	CPTP	STAT4					CLU
BRSK2		PCBP2	CSNK2A2	STAT5A					CPLX2
BTK		PEBP1	CTSA	STAT5B					CTNS
CAAP1		PGD	CTTN	STAT6					CTSA
CASP1		PHKG2	DAP	H2A					CTSB
CASP10		PRNP	DAPK1	TNFAIP3					CTSC
CASP12		PROM2	DAPK2	RNF31					CTSD
CASP2		PTGS2	DAPK3	CHMP2A					CTSE
CASP3		RPL8	DAPL1	CHMP2B					CTSF
CASP4		SAT1	DCN	VPS24					CTSG
CASP5		SAT2	DDIT3	CHMP4A					CTSH
CASP8		SLC11A2	DDRGK1	CHMP4B					CTSK
CASP8AP2		SLC1A5	DEPDC5	CHMP6					CTSL
CASP9		SLC39A14	DEPP1	VPS4					CTSO
CAV1		SLC39A8	DHRSX	CHMP1					CTSS
CCAR2		SLC3A2	DNM1L	CHMP5					CTSV
CCK		SLC40A1	DRAM1	SMPD1					CTSW
CD14		SLC7A11	DRAM2	PYCARD					CTSZ
CD24		SQLE	EEF1A1	NLRP3					DEF8
CD27		STEAP3	EEF1A2	ZBP1					DNASE2
CD28		TF	EIF2AK4	IL33					DNASE2B
CD38		TFRC	EIF4G1	FTL					ENTPD4
CD3E		TP53	EIF4G2	SQSTM1					FAM98A
CD44		VDAC2	ELAPOR1	VDAC2					FER
CD5		VDAC3	EP300	VDAC3					FES
CD70		ZEB1	EPM2A	CHMP7					FGR
CD74			ERCC4	PGAM5					FLCN
CDIP1			ERN1	BIRC2					FOXF1
CDKN1A			EXOC1	BIRC3					FTH1
CDKN2D			EXOC4	EIF2AK2					FTL
CEBPB			EXOC7	PLA2G4					FUCA1
CFLAR			EXOC8	DNM1L					GAA
CHAC1			FBXL2	SPATA2					GAB2
CHCHD10			FBXO7	FAF1					GALC
CHEK2			FBXW7	SHARPIN					GALNS
CIB1			FEZ1	NOX2					GATA2
CIDEB			FEZ2	USP21					GBA
CLU			FLCN	PARP1					GCC2
COA8			FOXK1	CHMP4C					GGA1
COL2A1			FOXK2						GGA2
CRADD			FOXO1						GGA3
CREB3			FOXO3						GLA
CREB3L1			FTH1						GLB1
CRH			FTL						GM2A
CRIP1			FYCO1						GNPTAB
CSF2			FZD5						GNPTG
CSNK2A1			GAPDH						GNS
CSNK2A2			GATA4						GUSB
CTH			GBA						HDAC6
CTNNA1			GFAP						HEXA
CTSC			GNAI3						HEXB
CTTN			GOLGA2						HGS
CUL1			GPR137						HGSNAT
CUL2			GPR137B						HMOX1
CUL3			GPSM1						HPS6
CUL4A			GSK3A						HSPA8
CUL5			GSK3B						HYAL1
CX3CL1			HAX1						IDS
CX3CR1			HDAC6						IDUA
CXCL12			HERC1						IGF2R
CYLD			HGF						IL13
CYP1B1			HIF1A						IL13RA2
DAB2IP			HMGB1						IL4
DAP			HMOX1						IL4R
DAP3			HSP90AA1						KIF1B
DAPK1			HSPA8						KIT
DAPK2			HSPB1						KXD1
DAPK3			HSPB8						LAMP1
DAPL1			HTR2B						LAMP2
DAXX			HTRA2						LAMP3
DBH			HTT						LAMTOR1
DCC			HUWE1						LAPTM4A
DDIAS			IFI16						LAPTM4B
DDIT3			IFNG						LAPTM5
DDIT4			IKBKG						LAT
DDX3X			IL10						LAT2
DDX47			IL1ORA						LGALS9
DDX5			IL4						LGMN
DEDD			IRGM						LIPA
DEDD2			ITPR1						LRRK2
DELE1			KAT5						LYN
DEPTOR			KAT8						M6PR
DIABLO			KDM4A						MAN2B1
DIDO1			KDR						MANBA
DNAJA1			KEAP1						MAP1LC3A
DNAJC10			KIF25						MAP6
DNM1L			KLHL22						MCOLN1
DPF2			KLHL3						MFSD8
DYRK2			LACRT						MILR1
E2F1			LAMP1						MRGPRX2
E2F2			LAMP2						MT3
EDA2R			LAMP3						MYH9
EIF2AK3			LAMTOR1						NAGA
ELL3			LAMTOR2						NAGLU
ENO1			LAMTOR3						NAGPA
EP300			LAMTOR4						NAPSA
EPHA2			LAMTOR5						NCOA4
EPO			LARP1						NDEL1
ERBB3			LEP						NEDD4
ERCC6			LEPR						NEU1
ERN1			LGALS8						NPC1
ERN2			LRRK2						NPC2
ERO1A			LRSAM1						NR4A3
ERP29			LZTS1						PDPK1
EYA1			MAP1LC3A						PIK3C3
EYA2			MAP1LC3B						PIK3CD
EYA3			MAP1LC3C						PIK3CG
EYA4			MAP3K7						PIP4K2A
FADD			MAPK15						PIP4K2B
FAF1			MAPK3						PIP4P1
FAIM			MAPK8						PLA2G15
FAIM2			MAPT						PEA2G3
FAM162A			MCL1						PLEKHM1
FAS			MEFV						PLEKHM2
FASLG			MET						PPT1
FASTK			MFN2						PPT2
FBH1			MFSD8						PSAP
FBXW7			MID2						PSAPL1
FEM1B			MIR199A1						PTGDR
FGA			MIRLET7B						PTGDS
FGB			MLST8						RAB34
FGF10			MT3						RAB3A
FGFR1			MTCL1						RAB7A
FGFR3			MTDH						RAC2
FGG			MTM1						RUBCNL
FHIT			MTMR3						S100A13
FIGNL1			MTMR4						SCARB2
FIS1			MTMR8						SGSH
FNIP2			MTMR9						SLC11A1
FXN			MTOR						SLC11A2
FYN			NCOA4						SLC17A5
FZD9			NEDD4						SMPD1
G0S2			NLRP6						SNAP23
GABARAP			NOD1						SNAPIN
GATA1			NOD2						SNX16
GATA4			NPC1						SNX4
GCLM			NPRL2						SORL1
GDNF			NRBP2						SORT1
GFRAL			NUPR1						SPAG9
GGCT			OPTN						SPHK2
GHITM			ORMDL3						SQSTM1
GNAI2			OSBPL7						STXBP1
GNAI3			PAFAH1B2						STXBP2
GPER1			PARK7						SUMF1
GPX1			PHB2						SYK
GRINA			PHF23						SYTL4
GSDME			PIK3C2A						TCIRG1
GSK3A			PIK3C3						TFEB
GSK3B			PIK3CA						TMEM106B
GSKIP			PIK3CB						TPP1
GSTP1			PIK3R2						UNC13D
GZMB			PIM2						VAMP7
HDAC1			PINK1						VAMP8
HERPUD1			PIP4K2A						VPS33A
HGF			PIP4K2B						VPS33B
HIC1			PIP4K2C						VPS4A
HIF1A			PJVK						WASH3P
HINT1			PLEKHF1						ZFYVE16
HIP1			PLK2
HIP1R			PLK3
HIPK1			POLDIP2
HIPK2			PRKAA1
HMGB2			PRKAA2
HMOX1			PRKAB1
HNRNPK			PRKAB2
HRAS			PRKACA
HRK			PRKAG1
HSPA1A			PRKAG2
HSPA1B			PRKAG3
HSPB1			PRKD1
HTRA2			PRKN
HTT			PSAP
HYAL2			PTPN22
HYOU1			PYCARD
ICAM1			QSOX1
IFI16			RAB39B
IFI27			RAB3GAP1
IFI27L1			RAB3GAP2
IFH27L2			RAB7A
IFI6			RAB8A
IFNB1			RALB
IFNG			RASIP1
IGF1			RB1CC1
IKBKE			RETREG1
IL12A			RETREG3
IL19			RHEB
IL1A			RIPK2
IL1B			RMC1
IL2			RNF152
IL20RA			RNF41
IL33			RNF5
IL4			ROCK1
IL6R			RPTOR
IL7			RRAGA
INCA1			RRAGB
ING2			RRAGC
ING5			RRAGD
INHBA			RUBCN
INHBB			RUFY4
INS			SCFD1
ITGA6			SCOC
ITGAM			SEC22B
ITGAV			SESN1
ITM2C			SESN2
ITPR1			SESN3
ITPRIP			SH3BP4
IVNS1ABP			SH3GLB1
JAK2			SIRT1
JMY			SIRT2
JUN			SLC38A9
KDM1A			SMCR8
KITLG			SMG1
KRT18			SNCA
KRT8			SNRNP70
LCK			SNX32
LGALS12			SNX5
LGALS3			SNX6
LRRK2			SOGA1
LTBR			SOGA3
LY96			SPTLC1
MADD			SPTLC2
MAEL			SQSTM1
MAGEA3			SREBF1
MAP2K5			SREBF2
MAP3K5			STAT3
MAPK7			STBD1
MAPK8			STING1
MAPK8IP1			STK11
MAPK8IP2			STUB1
MAPK9			SUPT5H
MARCHF7			SVIP
MAZ			SYNPO2
MCL1			TAB2
MDM2			TAB3
MELK			TBC1D14
MFF			TBC1D25
MIF			TBK1
MIR132			TEX264
MIR15A			TFEB
MIR16-1			TICAM1
MIR17			TIGAR
MIR198			TLK2
MIR21			TMEM150A
MIR210			TMEM150B
MIR221			TMEM150C
MIR222			TMEM39A
MIR26B			TMEM39B
MIR27B			TMEM59
MIR449A			TOMM7
MKNK2			TP53
MLH1			TP53INP1
MLLT11			TP53INP2
MMP9			TPCN1
MNT			TPCN2
MOAP1			TREM2
MPV17L			TRIB3
MSH2			TRIM13
MSH6			TRIM14
MSX1			TRIM21
MUC1			TRIM22
MUL1			TRIM27
MYBBP1A			TRIM34
NACC2			TRIM38
NANOS3			TRIM5
NBN			TRIM6
NCK1			TRIM65
NCK2			TRIM68
NDUFA13			TRIM8
NDUFS3			TRIML1
NFATC4			TRIML2
NFE2L2			TSC1
NGF			TSC2
NGFR			TSPO
NKX3-1			UBA5
NLE1			UBQLN1
NME5			UBQLN2
NMT1			UBQLN4
NOC2L			UCHL1
NOG			UFC1
NOL3			UFL1
NONO			UFM1
NOS3			ULK1
NOX1			USP10
NR4A2			USP13
NUPR1			USP30
OPA1			USP33
P2RX4			USP36
P2RX7			UVRAG
P4HB			VDAC1
PAK2			VPS13C
PAK5			VPS13D
PARK7			VPS26A
PARP1			VPS26B
PARP2			VPS35
PAWR			WAC
PCGF2			WASHC1
PDCD10			WDFY3
PDCD5			WDR24
PDCD6			WDR41
PDIA3			WDR6
PDK1			WDR81
PDK2			WIPI2
PDPK1			ZC3H12A
PDX1			ZKSCAN3
PEA15			ZMPSTE24
PELI3
PERP
PF4
PHIP
PHLDA3
PIAS4
PIDD1
PIH1D1
PIK3R1
PINK1
PLAGL2
PLAUR
PLEKHF1
PLSCR3
PMAIP1
PML
POLB
POU4F1
POU4F2
PPARD
PPIA
PPIF
PPM1F
PPP1CA
PPP1R13B
PPP1R15A
PPP2R1B
PPP3CC
PPP3R1
PRDX2
PRELID1
PRKCA
PRKCD
PRKDC
PRKN
PRKRA
PRODH
PSEN1
PSMD10
PSME3
PTEN
PTGIS
PTH
PTPMT1
PTPN1
PTPN2
PTPRC
PTTG1IP
PYCARD
QARS1
RACK1
RAF1
RB1
RB1CC1
RBCK1
RELA
RET
RFFL
RHOT1
RHOT2
RIPK1
RIPK3
RNF183
RNF186
RNF34
RNF41
RPL11
RPL26
RPS27L
RPS3
RPS6KB1
RPS7
RRP8
RTKN2
RTL10
S100A8
S100A9
SCG2
SCN2A
SCRT2
SELENOK
SELENOS
SENP1
SEPTIN4
SERINC3
SERPINE1
SFN
SFPQ
SFRP1
SFRP2
SGMS1
SGPL1
SGPP1
SH3RF1
SHH
SHISA5
SIAH1
SIAH2
SIRT1
SIVA1
SKIL
SLC25A5
SLC35F6
SLC9A3R1
SMAD3
SNAI1
SNAI2
SNW1
SOD1
SOD2
SORT1
SP100
SRC
SRPX
SST
SSTR3
ST20
STK11
STK24
STK25
STK3
STK4
STRADB
STX4
STYXL1
SYVN1
TAF9
TAF9B
TCF7L2
TERT
TFDP1
TFDP2
TFPT
TGFB1
TGFB2
TGFBR1
THBS1
TICAM1
TICAM2
TIMM50
TIMP3
TLR3
TLR4
TM2D1
TMBIM1
TMBIM6
TMC8
TMEM102
TMEM109
TMEM117
TMEM14A
TMEM161A
TNF
TNFAIP3
TNFRSF10A
TNFRSF10B
TNFRSF10C
TNFRSF12A
TNFRSF1A
TNFRSF1B
TNFRSF25
TNFSF10
TNFSF12
TOPORS
TP53
TP53BP2
TP63
TP73
TPD52L1
TPT1
TRADD
TRAF1
TRAF2
TRAF7
TRAP1
TRIAP1
TRIB3
TRIM32
TRIM39
TXNDC12
TYROBP
UACA
UBB
UBE2K
UBE4B
UBQLN1
UMOD
UNC5B
URI1
USP28
USP47
VDAC2
VNN1
WDR35
WNT4
WWOX
XBP1
YAP1
YBX3
YWHAB
YWHAE
YWHAG
YWHAH
YWHAQ
YWHAZ
ZC3HC1
ZDHHC3
ZMYND11
ZNF205
ZNF385A
ZNF385B
ZNF622
ZSWIM2
