# Supplementary material for: A prognostic risk model for programmed cell death and revealing TRIB3 as a promising apoptosis suppressor in renal cell carcinoma
Source: Aging (Albany NY). 2023 Nov 22;15(22):13213–38. doi: 10.18632/aging.205237 (PMC10713411; doi:10.18632/aging.205237)
Supplement: Supplementary Table 2 [file aging-15-205237-s003.xlsx]

## Sheet: Sheet1
Supplementary Table 2. The correlations between 9 PRPCDGs and KEGG pathways (PCC＞0.35|PCC＜-0.3, adj.P-value＜0.05).
Items	Genes	PCC	P-value	adj.P-value	Regualtion	No.
KEGG_ADHERENS_JUNCTION	NTRK2	0.362454	0	0	up	KEGG126
KEGG_ADIPOCYTOKINE_SIGNALING_PATHWAY	TRIB3	-0.37075	0	0	down	KEGG153
KEGG_ADIPOCYTOKINE_SIGNALING_PATHWAY	UCHL1	-0.301725	1.00808e-12	2.89962e-12	down	KEGG153
KEGG_ALLOGRAFT_REJECTION	ATP6V0A4	-0.308377	2.99538e-13	8.79929e-13	down	KEGG184
KEGG_AMYOTROPHIC_LATERAL_SCLEROSIS_ALS	DCN	0.472493	0	0	up	KEGG161
KEGG_ARRHYTHMOGENIC_RIGHT_VENTRICULAR_CARDIOMYOPATHY_ARVC	DCN	0.497889	0	0	up	KEGG34
KEGG_ARRHYTHMOGENIC_RIGHT_VENTRICULAR_CARDIOMYOPATHY_ARVC	NTRK2	0.398985	0	0	up	KEGG34
KEGG_ASCORBATE_AND_ALDARATE_METABOLISM	PROM2	-0.362465	0	0	down	KEGG42
KEGG_ASTHMA	ATP6V0A4	-0.322117	2.22045e-14	6.84454e-14	down	KEGG182
KEGG_AUTOIMMUNE_THYROID_DISEASE	ATP6V0A4	-0.31588	7.32747e-14	2.2122e-13	down	KEGG183
KEGG_AXON_GUIDANCE	DCN	0.424634	0	0	up	KEGG121
KEGG_AXON_GUIDANCE	NTRK2	0.373829	0	0	up	KEGG121
KEGG_BASAL_CELL_CARCINOMA	DCN	0.609329	0	0	up	KEGG175
KEGG_BASE_EXCISION_REPAIR	TRIB3	0.419251	0	0	up	KEGG95
KEGG_BETA_ALANINE_METABOLISM	PROM2	-0.345483	2.22045e-16	7.41522e-16	down	KEGG61
KEGG_BETA_ALANINE_METABOLISM	UCHL1	-0.330444	4.21885e-15	1.34154e-14	down	KEGG61
KEGG_CALCIUM_SIGNALING_PATHWAY	DCN	0.523317	0	0	up	KEGG101
KEGG_CALCIUM_SIGNALING_PATHWAY	NTRK2	0.371646	0	0	up	KEGG101
KEGG_CARDIAC_MUSCLE_CONTRACTION	ATP6V0A4	0.35898	0	0	up	KEGG25
KEGG_CARDIAC_MUSCLE_CONTRACTION	UCHL1	0.352788	0	0	up	KEGG25
KEGG_CELL_ADHESION_MOLECULES_CAMS	ATP6V1C2	-0.325333	1.17684e-14	3.67136e-14	down	KEGG125
KEGG_CHEMOKINE_SIGNALING_PATHWAY	ATP6V1C2	-0.302333	9.03277e-13	2.60339e-12	down	KEGG103
KEGG_CHRONIC_MYELOID_LEUKEMIA	NTRK2	0.375113	0	0	up	KEGG178
KEGG_CIRCADIAN_RHYTHM_MAMMAL	UCHL1	-0.419557	0	0	down	KEGG27
KEGG_COLORECTAL_CANCER	NTRK2	0.356793	0	0	up	KEGG168
KEGG_COMPLEMENT_AND_COAGULATION_CASCADES	DCN	0.447691	0	0	up	KEGG129
KEGG_CYTOKINE_CYTOKINE_RECEPTOR_INTERACTION	ATP6V1C2	-0.304594	5.9952e-13	1.74084e-12	down	KEGG102
KEGG_DILATED_CARDIOMYOPATHY	DCN	0.595133	0	0	up	KEGG35
KEGG_DILATED_CARDIOMYOPATHY	NTRK2	0.382544	0	0	up	KEGG35
KEGG_DNA_REPLICATION	TRIB3	0.36679	0	0	up	KEGG90
KEGG_DORSO_VENTRAL_AXIS_FORMATION	ATP6V1C2	-0.305099	5.46674e-13	1.59111e-12	down	KEGG117
KEGG_DORSO_VENTRAL_AXIS_FORMATION	NTRK2	0.364166	0	0	up	KEGG117
KEGG_ECM_RECEPTOR_INTERACTION	DCN	0.591612	0	0	up	KEGG124
KEGG_ENDOCYTOSIS	NTRK2	0.364749	0	0	up	KEGG111
KEGG_ENDOMETRIAL_CANCER	NTRK2	0.386816	0	0	up	KEGG171
KEGG_ERBB_SIGNALING_PATHWAY	NTRK2	0.364577	0	0	up	KEGG100
KEGG_FATTY_ACID_METABOLISM	TRIB3	-0.353352	0	0	down	KEGG43
KEGG_FC_GAMMA_R_MEDIATED_PHAGOCYTOSIS	DCN	0.359958	0	0	up	KEGG141
KEGG_FOCAL_ADHESION	DCN	0.471443	0	0	up	KEGG123
KEGG_FOCAL_ADHESION	NTRK2	0.386238	0	0	up	KEGG123
KEGG_GAP_JUNCTION	DCN	0.483615	0	0	up	KEGG128
KEGG_GAP_JUNCTION	NTRK2	0.391067	0	0	up	KEGG128
KEGG_GLIOMA	NTRK2	0.358054	0	0	up	KEGG172
KEGG_GLYCOSAMINOGLYCAN_BIOSYNTHESIS_CHONDROITIN_SULFATE	DCN	0.467289	0	0	up	KEGG67
KEGG_GLYCOSAMINOGLYCAN_BIOSYNTHESIS_CHONDROITIN_SULFATE	UCHL1	0.387745	0	0	up	KEGG67
KEGG_GLYCOSAMINOGLYCAN_BIOSYNTHESIS_HEPARAN_SULFATE	DCN	0.520012	0	0	up	KEGG68
KEGG_GLYCOSAMINOGLYCAN_BIOSYNTHESIS_KERATAN_SULFATE	DCN	0.509824	0	0	up	KEGG5
KEGG_GLYCOSAMINOGLYCAN_BIOSYNTHESIS_KERATAN_SULFATE	TRIB3	0.361244	0	0	up	KEGG5
KEGG_GLYCOSAMINOGLYCAN_BIOSYNTHESIS_KERATAN_SULFATE	UCHL1	0.447709	0	0	up	KEGG5
KEGG_GLYCOSPHINGOLIPID_BIOSYNTHESIS_GANGLIO_SERIES	DCN	0.475645	0	0	up	KEGG16
KEGG_GLYCOSPHINGOLIPID_BIOSYNTHESIS_GANGLIO_SERIES	UCHL1	0.438358	0	0	up	KEGG16
KEGG_GLYCOSPHINGOLIPID_BIOSYNTHESIS_GLOBO_SERIES	DCN	0.390869	0	0	up	KEGG15
KEGG_HEDGEHOG_SIGNALING_PATHWAY	DCN	0.636751	0	0	up	KEGG119
KEGG_HISTIDINE_METABOLISM	DCN	-0.378513	0	0	down	KEGG57
KEGG_HISTIDINE_METABOLISM	PROM2	-0.358873	0	0	down	KEGG57
KEGG_HISTIDINE_METABOLISM	UCHL1	-0.392791	0	0	down	KEGG57
KEGG_HYPERTROPHIC_CARDIOMYOPATHY_HCM	DCN	0.609492	0	0	up	KEGG33
KEGG_HYPERTROPHIC_CARDIOMYOPATHY_HCM	NTRK2	0.363407	0	0	up	KEGG33
KEGG_INOSITOL_PHOSPHATE_METABOLISM	TRIB3	-0.346417	0	0	down	KEGG69
KEGG_INSULIN_SIGNALING_PATHWAY	NTRK2	0.361574	0	0	up	KEGG149
KEGG_INTESTINAL_IMMUNE_NETWORK_FOR_IGA_PRODUCTION	ATP6V0A4	-0.317317	5.59552e-14	1.69591e-13	down	KEGG143
KEGG_LEUKOCYTE_TRANSENDOTHELIAL_MIGRATION	ATP6V1C2	-0.325716	1.08802e-14	3.40225e-14	down	KEGG142
KEGG_LONG_TERM_DEPRESSION	DCN	0.425504	0	0	up	KEGG146
KEGG_LONG_TERM_POTENTIATION	DCN	0.411005	0	0	up	KEGG144
KEGG_LONG_TERM_POTENTIATION	NTRK2	0.378244	0	0	up	KEGG144
KEGG_LYSINE_DEGRADATION	TRIB3	-0.325177	1.19904e-14	3.73625e-14	down	KEGG55
KEGG_MAPK_SIGNALING_PATHWAY	DCN	0.443877	0	0	up	KEGG99
KEGG_MAPK_SIGNALING_PATHWAY	NTRK2	0.370898	0	0	up	KEGG99
KEGG_MELANOGENESIS	DCN	0.51045	0	0	up	KEGG152
KEGG_MELANOGENESIS	NTRK2	0.394978	0	0	up	KEGG152
KEGG_MELANOMA	DCN	0.423828	0	0	up	KEGG176
KEGG_MELANOMA	NTRK2	0.393023	0	0	up	KEGG176
KEGG_NEUROACTIVE_LIGAND_RECEPTOR_INTERACTION	DCN	0.525701	0	0	up	KEGG105
KEGG_NEUROTROPHIN_SIGNALING_PATHWAY	NTRK2	0.427514	0	0	up	KEGG145
KEGG_NOTCH_SIGNALING_PATHWAY	ATP6V1C2	-0.303923	6.77236e-13	1.96131e-12	down	KEGG118
KEGG_O_GLYCAN_BIOSYNTHESIS	DCN	0.357448	0	0	up	KEGG3
KEGG_ONE_CARBON_POOL_BY_FOLATE	PROM2	-0.351899	0	0	down	KEGG74
KEGG_OOCYTE_MEIOSIS	DCN	0.35245	0	0	up	KEGG107
KEGG_OXIDATIVE_PHOSPHORYLATION	ATP6V1C2	0.35658	0	0	up	KEGG47
KEGG_P53_SIGNALING_PATHWAY	TRIB3	0.444952	0	0	up	KEGG108
KEGG_P53_SIGNALING_PATHWAY	UCHL1	0.376781	0	0	up	KEGG108
KEGG_PATHOGENIC_ESCHERICHIA_COLI_INFECTION	DCN	0.469721	0	0	up	KEGG30
KEGG_PATHWAYS_IN_CANCER	DCN	0.461489	0	0	up	KEGG167
KEGG_PATHWAYS_IN_CANCER	NTRK2	0.383162	0	0	up	KEGG167
KEGG_PHENYLALANINE_METABOLISM	MYH14	0.370959	0	0	up	KEGG59
KEGG_PHOSPHATIDYLINOSITOL_SIGNALING_SYSTEM	TRIB3	-0.305661	4.93383e-13	1.43758e-12	down	KEGG104
KEGG_PPAR_SIGNALING_PATHWAY	UCHL1	-0.324404	1.42109e-14	4.41485e-14	down	KEGG94
KEGG_PRION_DISEASES	DCN	0.517933	0	0	up	KEGG163
KEGG_PROPANOATE_METABOLISM	DCN	-0.315974	7.19425e-14	2.17303e-13	down	KEGG72
KEGG_PROPANOATE_METABOLISM	TRIB3	-0.311527	1.66755e-13	4.95807e-13	down	KEGG72
KEGG_PROSTATE_CANCER	NTRK2	0.367406	0	0	up	KEGG173
KEGG_PURINE_METABOLISM	TRIB3	0.378444	0	0	up	KEGG48
KEGG_PYRIMIDINE_METABOLISM	TRIB3	0.373875	0	0	up	KEGG49
KEGG_REGULATION_OF_ACTIN_CYTOSKELETON	DCN	0.485779	0	0	up	KEGG148
KEGG_REGULATION_OF_AUTOPHAGY	TRIB3	-0.310966	1.85185e-13	5.49463e-13	down	KEGG110
KEGG_RENAL_CELL_CARCINOMA	NTRK2	0.370382	0	0	up	KEGG169
KEGG_RENIN_ANGIOTENSIN_SYSTEM	ATP6V1C2	-0.304261	6.36824e-13	1.846e-12	down	KEGG26
KEGG_RENIN_ANGIOTENSIN_SYSTEM	UCHL1	-0.306238	4.44089e-13	1.29639e-12	down	KEGG26
KEGG_SMALL_CELL_LUNG_CANCER	NTRK2	0.366106	0	0	up	KEGG180
KEGG_STARCH_AND_SUCROSE_METABOLISM	ATP6V1C2	-0.301116	1.12443e-12	3.22433e-12	down	KEGG65
KEGG_STEROID_BIOSYNTHESIS	ATP6V0A4	0.352308	0	0	up	KEGG44
KEGG_STEROID_BIOSYNTHESIS	MYH14	0.375617	0	0	up	KEGG44
KEGG_TAURINE_AND_HYPOTAURINE_METABOLISM	DCN	0.425611	0	0	up	KEGG62
KEGG_TGF_BETA_SIGNALING_PATHWAY	DCN	0.431397	0	0	up	KEGG120
KEGG_TGF_BETA_SIGNALING_PATHWAY	NTRK2	0.394529	0	0	up	KEGG120
KEGG_THYROID_CANCER	NTRK2	0.362556	0	0	up	KEGG174
KEGG_TIGHT_JUNCTION	NTRK2	0.369311	0	0	up	KEGG127
KEGG_TRYPTOPHAN_METABOLISM	PROM2	-0.319146	3.93019e-14	1.198e-13	down	KEGG60
KEGG_TYROSINE_METABOLISM	MYH14	0.352659	0	0	up	KEGG58
KEGG_VALINE_LEUCINE_AND_ISOLEUCINE_DEGRADATION	DCN	-0.34624	0	0	down	KEGG53
KEGG_VALINE_LEUCINE_AND_ISOLEUCINE_DEGRADATION	TRIB3	-0.310585	1.98952e-13	5.89653e-13	down	KEGG53
KEGG_VASCULAR_SMOOTH_MUSCLE_CONTRACTION	DCN	0.385587	0	0	up	KEGG115
KEGG_VASCULAR_SMOOTH_MUSCLE_CONTRACTION	NTRK2	0.381071	0	0	up	KEGG115
KEGG_VASOPRESSIN_REGULATED_WATER_REABSORPTION	NTRK2	0.37935	0	0	up	KEGG158
KEGG_VASOPRESSIN_REGULATED_WATER_REABSORPTION	TRIB3	-0.313283	1.19904e-13	3.58913e-13	down	KEGG158
KEGG_VIBRIO_CHOLERAE_INFECTION	ATP6V0A4	0.420875	0	0	up	KEGG164
KEGG_VIBRIO_CHOLERAE_INFECTION	ATP6V1C2	0.355833	0	0	up	KEGG164
KEGG_VIBRIO_CHOLERAE_INFECTION	UCHL1	0.386143	0	0	up	KEGG164
KEGG_WNT_SIGNALING_PATHWAY	DCN	0.504466	0	0	up	KEGG116
KEGG_WNT_SIGNALING_PATHWAY	NTRK2	0.409705	0	0	up	KEGG116
