# Supplementary material for: A prognostic risk model for programmed cell death and revealing TRIB3 as a promising apoptosis suppressor in renal cell carcinoma
Source: Aging (Albany NY). 2023 Nov 22;15(22):13213–38. doi: 10.18632/aging.205237 (PMC10713411; doi:10.18632/aging.205237)
Supplement: Supplementary Table 3 [file aging-15-205237-s004.xlsx]

## Sheet: Sheet1
Supplementary Table 3. The correlations between 9 PRPCDGs and MF terms (PCC＞0.45|PCC＜-0.4, adj.P-value＜0.05).
Items	Genes	PCC	P-value	adj.P-value	Regualtion	No.
GOMF_ACETYLCHOLINE_RECEPTOR_BINDING	DCN	0.46395	0	0	up	MF1103
GOMF_ACETYLGALACTOSAMINYLTRANSFERASE_ACTIVITY	DCN	0.462712	0	0	up	MF511
GOMF_ACTIN_BINDING	DCN	0.482349	0	0	up	MF107
GOMF_ACTIN_FILAMENT_BINDING	DCN	0.45924	0	0	up	MF1405
GOMF_ACYL_COA_DEHYDROGENASE_ACTIVITY	DCN	-0.444923	0	0	down	MF132
GOMF_ADENYLATE_CYCLASE_BINDING	TRIB3	-0.451924	0	0	down	MF468
GOMF_ADRENERGIC_RECEPTOR_BINDING	DCN	0.542393	0	0	up	MF1050
GOMF_AMINE_BINDING	DCN	0.559368	0	0	up	MF1259
GOMF_AROMATIC_AMINO_ACID_TRANSMEMBRANE_TRANSPORTER_ACTIVITY	TRIB3	0.49506	0	0	up	MF603
GOMF_ATPASE_COUPLED_ION_TRANSMEMBRANE_TRANSPORTER_ACTIVITY	ATP6V0A4	0.505326	0	0	up	MF1223
GOMF_AZOLE_TRANSMEMBRANE_TRANSPORTER_ACTIVITY	TRIB3	0.457107	0	0	up	MF1668
GOMF_BIOACTIVE_LIPID_RECEPTOR_ACTIVITY	DCN	0.489466	0	0	up	MF1300
GOMF_BMP_BINDING	DCN	0.690308	0	0	up	MF1185
GOMF_CALCIUM_CHANNEL_REGULATOR_ACTIVITY	DCN	0.451983	0	0	up	MF363
GOMF_CALCIUM_DEPENDENT_PROTEIN_BINDING	DCN	0.475817	0	0	up	MF1371
GOMF_CALCIUM_ION_TRANSMEMBRANE_TRANSPORTER_ACTIVITY	DCN	0.477743	0	0	up	MF584
GOMF_CARGO_RECEPTOR_ACTIVITY	DCN	0.454707	0	0	up	MF1191
GOMF_CATION_CHANNEL_ACTIVITY	DCN	0.502405	0	0	up	MF369
GOMF_CELL_ADHESION_MEDIATOR_ACTIVITY	DCN	0.534685	0	0	up	MF1585
GOMF_CELL_CELL_ADHESION_MEDIATOR_ACTIVITY	DCN	0.48152	0	0	up	MF1586
GOMF_COLLAGEN_BINDING	DCN	0.684473	0	0	up	MF409
GOMF_CYTOKINE_ACTIVITY	DCN	0.498345	0	0	up	MF323
GOMF_DEATH_RECEPTOR_ACTIVITY	ATP6V0A4	-0.455826	0	0	down	MF300
GOMF_DOPAMINE_RECEPTOR_BINDING	DCN	0.474708	0	0	up	MF1394
GOMF_EFFLUX_TRANSMEMBRANE_TRANSPORTER_ACTIVITY	UCHL1	-0.43312	0	0	down	MF665
GOMF_ENDOPEPTIDASE_ACTIVITY	DCN	0.544487	0	0	up	MF155
GOMF_ENDOPEPTIDASE_ACTIVITY	UCHL1	0.469008	0	0	up	MF155
GOMF_ENDOPEPTIDASE_REGULATOR_ACTIVITY	DCN	0.464606	0	0	up	MF1466
GOMF_ENDOPEPTIDASE_REGULATOR_ACTIVITY	UCHL1	0.457794	0	0	up	MF1466
GOMF_ENOYL_COA_HYDRATASE_ACTIVITY	DCN	-0.438069	0	0	down	MF165
GOMF_ENZYME_INHIBITOR_ACTIVITY	DCN	0.525669	0	0	up	MF262
GOMF_EPHRIN_RECEPTOR_ACTIVITY	DCN	0.45632	0	0	up	MF293
GOMF_EPHRIN_RECEPTOR_BINDING	ATP6V1C2	-0.430044	0	0	down	MF1324
GOMF_EXTRACELLULAR_MATRIX_BINDING	DCN	0.559768	0	0	up	MF1400
GOMF_EXTRACELLULAR_MATRIX_STRUCTURAL_CONSTITUENT	DCN	0.71777	0	0	up	MF347
GOMF_EXTRACELLULAR_MATRIX_STRUCTURAL_CONSTITUENT_CONFERRING_COMPRESSION_RESISTANCE	DCN	0.75521	0	0	up	MF959
GOMF_EXTRACELLULAR_MATRIX_STRUCTURAL_CONSTITUENT_CONFERRING_TENSILE_STRENGTH	DCN	0.632236	0	0	up	MF958
GOMF_FIBROBLAST_GROWTH_FACTOR_RECEPTOR_BINDING	DCN	0.491949	0	0	up	MF315
GOMF_FIBRONECTIN_BINDING	DCN	0.571857	0	0	up	MF71
GOMF_FRIZZLED_BINDING	DCN	0.671518	0	0	up	MF317
GOMF_G_PROTEIN_ALPHA_SUBUNIT_BINDING	DCN	0.48307	0	0	up	MF70
GOMF_G_PROTEIN_BETA_GAMMA_SUBUNIT_COMPLEX_BINDING	DCN	0.523694	0	0	up	MF1049
GOMF_G_PROTEIN_BETA_SUBUNIT_BINDING	DCN	0.464042	0	0	up	MF1047
GOMF_G_PROTEIN_COUPLED_RECEPTOR_BINDING	DCN	0.619008	0	0	up	MF58
GOMF_GABA_RECEPTOR_BINDING	TRIB3	-0.465189	0	0	down	MF1396
GOMF_GATED_CHANNEL_ACTIVITY	DCN	0.472563	0	0	up	MF941
GOMF_GLUCOSE_BINDING	TRIB3	0.529586	0	0	up	MF416
GOMF_GLUTAMATE_RECEPTOR_ACTIVITY	DCN	0.475805	0	0	up	MF438
GOMF_GLYCOSAMINOGLYCAN_BINDING	DCN	0.708333	0	0	up	MF418
GOMF_GROWTH_FACTOR_ACTIVITY	DCN	0.621785	0	0	up	MF442
GOMF_GROWTH_FACTOR_BINDING	DCN	0.471761	0	0	up	MF909
GOMF_GROWTH_FACTOR_RECEPTOR_BINDING	DCN	0.526537	0	0	up	MF1529
GOMF_HEPARAN_SULFATE_PROTEOGLYCAN_BINDING	DCN	0.578995	0	0	up	MF1270
GOMF_HEPARIN_BINDING	DCN	0.721017	0	0	up	MF478
GOMF_HYDROLASE_ACTIVITY_ACTING_ON_CARBON_NITROGEN_BUT_NOT_PEPTIDE_BONDS_IN_LINEAR_AMIDES	DCN	-0.420703	0	0	down	MF796
GOMF_INTEGRIN_BINDING	DCN	0.60442	0	0	up	MF342
GOMF_IONOTROPIC_GLUTAMATE_RECEPTOR_ACTIVITY	DCN	0.547008	0	0	up	MF284
GOMF_LAMININ_BINDING	DCN	0.566295	0	0	up	MF1265
GOMF_LIGAND_ACTIVATED_TRANSCRIPTION_FACTOR_ACTIVITY	UCHL1	-0.410131	0	0	down	MF1584
GOMF_LIGAND_GATED_CATION_CHANNEL_ACTIVITY	DCN	0.499472	0	0	up	MF1598
GOMF_LIGAND_GATED_CATION_CHANNEL_ACTIVITY	UCHL1	0.472942	0	0	up	MF1598
GOMF_LIGAND_GATED_ION_CHANNEL_ACTIVITY	DCN	0.510785	0	0	up	MF634
GOMF_LIGAND_GATED_SODIUM_CHANNEL_ACTIVITY	PROM2	0.453621	0	0	up	MF638
GOMF_METALLOENDOPEPTIDASE_ACTIVITY	DCN	0.614296	0	0	up	MF163
GOMF_METALLOPEPTIDASE_ACTIVITY	DCN	0.560668	0	0	up	MF483
GOMF_MONOCARBOXYLATE_SODIUM_SYMPORTER_ACTIVITY	UCHL1	-0.491149	0	0	down	MF1642
GOMF_MUSCLE_ALPHA_ACTININ_BINDING	DCN	0.567632	0	0	up	MF1418
GOMF_NEUREXIN_FAMILY_PROTEIN_BINDING	DCN	0.460816	0	0	up	MF1200
GOMF_NEUROTRANSMITTER_RECEPTOR_ACTIVITY	DCN	0.473242	0	0	up	MF1003
GOMF_NEUROTRANSMITTER_RECEPTOR_REGULATOR_ACTIVITY	DCN	0.468114	0	0	up	MF1607
GOMF_NEUROTRANSMITTER_RECEPTOR_REGULATOR_ACTIVITY	UCHL1	0.491938	0	0	up	MF1607
GOMF_NEUROTROPHIN_RECEPTOR_BINDING	DCN	0.494656	0	0	up	MF339
GOMF_OLIGOSACCHARIDE_BINDING	DCN	0.454371	0	0	up	MF1511
GOMF_PALMITOYL_COA_HYDROLASE_ACTIVITY	DCN	-0.416969	0	0	down	MF697
GOMF_PDZ_DOMAIN_BINDING	NTRK2	0.452661	0	0	up	MF964
GOMF_PEPTIDASE_REGULATOR_ACTIVITY	DCN	0.517453	0	0	up	MF1465
GOMF_PEPTIDASE_REGULATOR_ACTIVITY	UCHL1	0.461282	0	0	up	MF1465
GOMF_PHOSPHATIDYLINOSITOL_4_5_BISPHOSPHATE_BINDING	DCN	0.502082	0	0	up	MF424
GOMF_PHOSPHATIDYLSERINE_BINDING	DCN	0.499567	0	0	up	MF64
GOMF_PHOSPHOLIPASE_A2_ACTIVITY_CONSUMING_1_2_DIPALMITOYLPHOSPHATIDYLCHOLINE	UCHL1	0.454875	0	0	up	MF1613
GOMF_PLATELET_DERIVED_GROWTH_FACTOR_BINDING	DCN	0.609215	0	0	up	MF1373
GOMF_POTASSIUM_ION_TRANSMEMBRANE_TRANSPORTER_ACTIVITY	DCN	0.455343	0	0	up	MF582
GOMF_PROTEASE_BINDING	DCN	0.456403	0	0	up	MF73
GOMF_PROTEIN_MEMBRANE_ADAPTOR_ACTIVITY	UCHL1	-0.432558	0	0	down	MF1274
GOMF_PROTEOGLYCAN_BINDING	DCN	0.622137	0	0	up	MF1269
GOMF_RNA_POLYMERASE_BINDING	UCHL1	-0.477547	0	0	down	MF1490
GOMF_RNA_POLYMERASE_CORE_ENZYME_BINDING	TRIB3	-0.411484	0	0	down	MF1258
GOMF_RNA_POLYMERASE_CORE_ENZYME_BINDING	UCHL1	-0.446624	0	0	down	MF1258
GOMF_SCAVENGER_RECEPTOR_ACTIVITY	DCN	0.557501	0	0	up	MF303
GOMF_SERINE_HYDROLASE_ACTIVITY	DCN	0.473675	0	0	up	MF869
GOMF_SERINE_HYDROLASE_ACTIVITY	UCHL1	0.477217	0	0	up	MF869
GOMF_SERINE_TYPE_ENDOPEPTIDASE_INHIBITOR_ACTIVITY	UCHL1	0.457379	0	0	up	MF267
GOMF_SIALYLTRANSFERASE_ACTIVITY	DCN	0.50784	0	0	up	MF508
GOMF_SODIUM_CHANNEL_ACTIVITY	DCN	0.563192	0	0	up	MF371
GOMF_STRUCTURAL_CONSTITUENT_OF_CYTOSKELETON	DCN	0.513557	0	0	up	MF346
GOMF_STRUCTURAL_CONSTITUENT_OF_POSTSYNAPSE	DCN	0.493156	0	0	up	MF1602
GOMF_STRUCTURAL_MOLECULE_ACTIVITY_CONFERRING_ELASTICITY	DCN	0.606915	0	0	up	MF1576
GOMF_SULFOTRANSFERASE_ACTIVITY	DCN	0.466767	0	0	up	MF459
GOMF_SULFUR_COMPOUND_BINDING	DCN	0.628225	0	0	up	MF1674
GOMF_TRANSFORMING_GROWTH_FACTOR_BETA_ACTIVATED_RECEPTOR_ACTIVITY	DCN	0.462318	0	0	up	MF297
GOMF_TRANSLATION_REPRESSOR_ACTIVITY	UCHL1	-0.412139	0	0	down	MF988
GOMF_TRANSMEMBRANE_RECEPTOR_PROTEIN_KINASE_ACTIVITY	DCN	0.465886	0	0	up	MF881
GOMF_TRANSMEMBRANE_RECEPTOR_PROTEIN_TYROSINE_KINASE_ACTIVITY	DCN	0.465597	0	0	up	MF245
GOMF_TROPOMYOSIN_BINDING	DCN	0.492638	0	0	up	MF413
GOMF_TUMOR_NECROSIS_FACTOR_ACTIVATED_RECEPTOR_ACTIVITY	ATP6V0A4	-0.482935	0	0	down	MF299
GOMF_TUMOR_NECROSIS_FACTOR_RECEPTOR_SUPERFAMILY_BINDING	ATP6V0A4	-0.405116	0	0	down	MF1099
GOMF_VOLTAGE_GATED_CATION_CHANNEL_ACTIVITY	DCN	0.467851	0	0	up	MF945
GOMF_WNT_PROTEIN_BINDING	DCN	0.555273	0	0	up	MF863
