# Supplementary material for: A prognostic risk model for programmed cell death and revealing TRIB3 as a promising apoptosis suppressor in renal cell carcinoma
Source: Aging (Albany NY). 2023 Nov 22;15(22):13213–38. doi: 10.18632/aging.205237 (PMC10713411; doi:10.18632/aging.205237)
Supplement: Supplementary Table 4 [file aging-15-205237-s005.xlsx]

## Sheet: Sheet1
Supplementary Table 4. The correlations between 9 PRPCDGs and CC terms (PCC＞0.4|PCC＜-0.3, adj.P-value＜0.05).
Items	Genes	PCC	P-value	adj.P-value	Regualtion	No.
GOCC_DENDRITIC_SPINE_HEAD	ATP6V0A4	-0.302816	8.28e-13	2.31e-12	down	CC659
GOCC_INFLAMMASOME_COMPLEX	ATP6V0A4	-0.434179	0	0	down	CC723
GOCC_LUMENAL_SIDE_OF_ENDOPLASMIC_RETICULUM_MEMBRANE	ATP6V0A4	-0.301255	1.1e-12	3.05e-12	down	CC854
GOCC_MHC_CLASS_II_PROTEIN_COMPLEX	ATP6V0A4	-0.303414	7.43e-13	2.08e-12	down	CC605
GOCC_PROTON_TRANSPORTING_TWO_SECTOR_ATPASE_COMPLEX	ATP6V0A4	0.467812	0	0	up	CC267
GOCC_PROTON_TRANSPORTING_TWO_SECTOR_ATPASE_COMPLEX_CATALYTIC_DOMAIN	ATP6V0A4	0.420617	0	0	up	CC509
GOCC_PROTON_TRANSPORTING_V_TYPE_ATPASE_COMPLEX	ATP6V0A4	0.49169	0	0	up	CC507
GOCC_VACUOLAR_PROTON_TRANSPORTING_V_TYPE_ATPASE_COMPLEX	ATP6V0A4	0.519495	0	0	up	CC268
GOCC_BRUSH_BORDER	ATP6V1C2	-0.319574	3.62e-14	1.09e-13	down	CC209
GOCC_CAVEOLA	ATP6V1C2	-0.357765	0	0	down	CC207
GOCC_CELL_PROJECTION_MEMBRANE	ATP6V1C2	-0.339109	8.88e-16	2.9e-15	down	CC404
GOCC_CELL_SUBSTRATE_JUNCTION	ATP6V1C2	-0.319059	4e-14	1.2e-13	down	CC303
GOCC_CELL_TRAILING_EDGE	ATP6V1C2	-0.316649	6.35e-14	1.89e-13	down	CC405
GOCC_CILIARY_BASE	ATP6V1C2	-0.369316	0	0	down	CC844
GOCC_DENDRITIC_SPINE_HEAD	ATP6V1C2	-0.336513	1.33e-15	4.32e-15	down	CC659
GOCC_INFLAMMASOME_COMPLEX	ATP6V1C2	-0.329284	5.33e-15	1.67e-14	down	CC723
GOCC_LEADING_EDGE_MEMBRANE	ATP6V1C2	-0.302875	8.19e-13	2.29e-12	down	CC406
GOCC_MICROVILLUS	ATP6V1C2	-0.308428	2.97e-13	8.5e-13	down	CC208
GOCC_PHOTORECEPTOR_CONNECTING_CILIUM	ATP6V1C2	-0.32907	5.77e-15	1.81e-14	down	CC475
GOCC_PLASMA_MEMBRANE_RAFT	ATP6V1C2	-0.321214	2.62e-14	7.94e-14	down	CC669
GOCC_PROTEIN_COMPLEX_INVOLVED_IN_CELL_ADHESION	ATP6V1C2	-0.308138	3.13e-13	8.96e-13	down	CC864
GOCC_PROTON_TRANSPORTING_TWO_SECTOR_ATPASE_COMPLEX	ATP6V1C2	0.423425	0	0	up	CC267
GOCC_PROTON_TRANSPORTING_TWO_SECTOR_ATPASE_COMPLEX_CATALYTIC_DOMAIN	ATP6V1C2	0.400386	0	0	up	CC509
GOCC_PROTON_TRANSPORTING_V_TYPE_ATPASE_COMPLEX	ATP6V1C2	0.42531	0	0	up	CC507
GOCC_SYNAPTIC_CLEFT	ATP6V1C2	-0.33095	4e-15	1.26e-14	down	CC620
GOCC_VACUOLAR_PROTON_TRANSPORTING_V_TYPE_ATPASE_COMPLEX	ATP6V1C2	0.42527	0	0	up	CC268
GOCC_ACTIN_CYTOSKELETON	DCN	0.436291	0	0	up	CC250
GOCC_ACTIN_FILAMENT	DCN	0.48509	0	0	up	CC202
GOCC_ACTIN_FILAMENT_BUNDLE	DCN	0.492847	0	0	up	CC478
GOCC_ACTOMYOSIN	DCN	0.485438	0	0	up	CC609
GOCC_ANCHORED_COMPONENT_OF_MEMBRANE	DCN	0.5902	0	0	up	CC392
GOCC_ANCHORED_COMPONENT_OF_PLASMA_MEMBRANE	DCN	0.595829	0	0	up	CC696
GOCC_ANCHORED_COMPONENT_OF_SYNAPTIC_MEMBRANE	DCN	0.543798	0	0	up	CC921
GOCC_AXON_INITIAL_SEGMENT	DCN	0.410157	0	0	up	CC623
GOCC_BASEMENT_MEMBRANE	DCN	0.602858	0	0	up	CC98
GOCC_BLOOD_MICROPARTICLE	DCN	0.420982	0	0	up	CC786
GOCC_CATION_CHANNEL_COMPLEX	DCN	0.503177	0	0	up	CC536
GOCC_CELL_SUBSTRATE_JUNCTION	DCN	0.433128	0	0	up	CC303
GOCC_CILIARY_TRANSITION_ZONE	DCN	-0.333895	2.22e-15	7.11e-15	down	CC567
GOCC_COLLAGEN_CONTAINING_EXTRACELLULAR_MATRIX	DCN	0.718868	0	0	up	CC725
GOCC_COLLAGEN_TRIMER	DCN	0.703137	0	0	up	CC94
GOCC_COMPLEX_OF_COLLAGEN_TRIMERS	DCN	0.65334	0	0	up	CC865
GOCC_CONTRACTILE_FIBER	DCN	0.579162	0	0	up	CC636
GOCC_COSTAMERE	DCN	0.407154	0	0	up	CC618
GOCC_CYTOPLASMIC_SIDE_OF_MEMBRANE	DCN	0.436736	0	0	up	CC857
GOCC_DENDRITIC_SHAFT	DCN	0.488956	0	0	up	CC626
GOCC_DENSE_CORE_GRANULE	DCN	0.457946	0	0	up	CC376
GOCC_ENDOPLASMIC_RETICULUM_LUMEN	DCN	0.574438	0	0	up	CC157
GOCC_EXCITATORY_SYNAPSE	DCN	0.546097	0	0	up	CC711
GOCC_EXOCYTIC_VESICLE	DCN	0.468171	0	0	up	CC732
GOCC_EXTRINSIC_COMPONENT_OF_CYTOPLASMIC_SIDE_OF_PLASMA_MEMBRANE	DCN	0.476391	0	0	up	CC400
GOCC_EXTRINSIC_COMPONENT_OF_MITOCHONDRIAL_INNER_MEMBRANE	DCN	-0.323091	1.82e-14	5.56e-14	down	CC417
GOCC_EXTRINSIC_COMPONENT_OF_PLASMA_MEMBRANE	DCN	0.460849	0	0	up	CC292
GOCC_FIBRILLAR_COLLAGEN_TRIMER	DCN	0.69802	0	0	up	CC95
GOCC_FILOPODIUM_MEMBRANE	DCN	0.489908	0	0	up	CC436
GOCC_G_PROTEIN_BETA_GAMMA_SUBUNIT_COMPLEX	DCN	0.406078	0	0	up	CC444
GOCC_GABA_ERGIC_SYNAPSE	DCN	0.500789	0	0	up	CC905
GOCC_GAP_JUNCTION	DCN	0.423808	0	0	up	CC215
GOCC_GLUTAMATERGIC_SYNAPSE	DCN	0.454787	0	0	up	CC903
GOCC_GLYCOPROTEIN_COMPLEX	DCN	0.495231	0	0	up	CC800
GOCC_GOLGI_LUMEN	DCN	0.64196	0	0	up	CC163
GOCC_GTPASE_COMPLEX	DCN	0.529562	0	0	up	CC968
GOCC_HIPPOCAMPAL_MOSSY_FIBER_TO_CA3_SYNAPSE	DCN	0.528407	0	0	up	CC869
GOCC_I_BAND	DCN	0.582342	0	0	up	CC443
GOCC_INHIBITORY_SYNAPSE	DCN	0.462185	0	0	up	CC712
GOCC_INTEGRAL_COMPONENT_OF_SYNAPTIC_VESICLE_MEMBRANE	DCN	0.55368	0	0	up	CC330
GOCC_INTERMEDIATE_FILAMENT	DCN	0.413118	0	0	up	CC200
GOCC_INTERMEDIATE_FILAMENT_CYTOSKELETON	DCN	0.412168	0	0	up	CC672
GOCC_INTRACILIARY_TRANSPORT_PARTICLE	DCN	-0.389205	0	0	down	CC372
GOCC_INTRINSIC_COMPONENT_OF_EXTERNAL_SIDE_OF_PLASMA_MEMBRANE	DCN	0.452226	0	0	down	CC399
GOCC_INTRINSIC_COMPONENT_OF_POSTSYNAPTIC_DENSITY_MEMBRANE	DCN	0.4839	0	0	down	CC922
GOCC_INTRINSIC_COMPONENT_OF_POSTSYNAPTIC_MEMBRANE	DCN	0.532524	0	0	down	CC900
GOCC_INTRINSIC_COMPONENT_OF_POSTSYNAPTIC_SPECIALIZATION_MEMBRANE	DCN	0.518623	0	0	down	CC902
GOCC_INTRINSIC_COMPONENT_OF_PRESYNAPTIC_ACTIVE_ZONE_MEMBRANE	DCN	0.440024	0	0	down	CC901
GOCC_INTRINSIC_COMPONENT_OF_PRESYNAPTIC_MEMBRANE	DCN	0.525312	0	0	down	CC898
GOCC_INTRINSIC_COMPONENT_OF_SYNAPTIC_MEMBRANE	DCN	0.528253	0	0	down	CC923
GOCC_INTRINSIC_COMPONENT_OF_SYNAPTIC_VESICLE_MEMBRANE	DCN	0.538765	0	0	down	CC858
GOCC_LYSOSOMAL_LUMEN	DCN	0.417442	0	0	down	CC627
GOCC_MEMBRANE_MICRODOMAIN	DCN	0.402211	0	0	down	CC892
GOCC_MICROFIBRIL	DCN	0.77623	0	0	down	CC66
GOCC_MYOFILAMENT	DCN	0.639968	0	0	down	CC576
GOCC_NEUROMUSCULAR_JUNCTION	DCN	0.500993	0	0	down	CC439
GOCC_NEURON_SPINE	DCN	0.438677	0	0	down	CC656
GOCC_NEURON_TO_NEURON_SYNAPSE	DCN	0.441032	0	0	down	CC906
GOCC_NEUROTRANSMITTER_RECEPTOR_COMPLEX	DCN	0.426288	0	0	down	CC896
GOCC_PLATELET_ALPHA_GRANULE	DCN	0.520586	0	0	down	CC382
GOCC_PLATELET_ALPHA_GRANULE_LUMEN	DCN	0.531056	0	0	down	CC384
GOCC_PLATELET_DENSE_GRANULE	DCN	0.507953	0	0	up	CC615
GOCC_PLATELET_DENSE_GRANULE_LUMEN	DCN	0.504577	0	0	up	CC381
GOCC_PODOSOME	DCN	0.402964	0	0	up	CC85
GOCC_POSTSYNAPTIC_CYTOSOL	DCN	0.44378	0	0	up	CC929
GOCC_POSTSYNAPTIC_DENSITY_MEMBRANE	DCN	0.44185	0	0	up	CC888
GOCC_POSTSYNAPTIC_MEMBRANE	DCN	0.463556	0	0	up	CC680
GOCC_POSTSYNAPTIC_SPECIALIZATION_MEMBRANE	DCN	0.476443	0	0	up	CC933
GOCC_POTASSIUM_CHANNEL_COMPLEX	DCN	0.506381	0	0	up	CC538
GOCC_PRESYNAPSE	DCN	0.438979	0	0	up	CC875
GOCC_PRESYNAPTIC_ACTIVE_ZONE	DCN	0.409823	0	0	up	CC705
GOCC_PRESYNAPTIC_MEMBRANE	DCN	0.508147	0	0	up	CC611
GOCC_PROTEIN_COMPLEX_INVOLVED_IN_CELL_ADHESION	DCN	0.463487	0	0	up	CC864
GOCC_SARCOLEMMA	DCN	0.484241	0	0	up	CC588
GOCC_SCHAFFER_COLLATERAL_CA1_SYNAPSE	DCN	0.464945	0	0	up	CC868
GOCC_SODIUM_CHANNEL_COMPLEX	DCN	0.495348	0	0	up	CC539
GOCC_STRIATED_MUSCLE_THIN_FILAMENT	DCN	0.649692	0	0	up	CC191
GOCC_SYNAPTIC_MEMBRANE	DCN	0.469234	0	0	up	CC805
GOCC_SYNAPTIC_VESICLE_MEMBRANE	DCN	0.49264	0	0	up	CC348
GOCC_TRANSPORTER_COMPLEX	DCN	0.465123	0	0	up	CC980
GOCC_VESICLE_LUMEN	DCN	0.433683	0	0	up	CC458
GOCC_CARBOXY_TERMINAL_DOMAIN_PROTEIN_KINASE_COMPLEX	MT1G	-0.304512	6.08e-13	1.71e-12	down	CC493
GOCC_NUCLEAR_CYCLIN_DEPENDENT_PROTEIN_KINASE_HOLOENZYME_COMPLEX	MT1G	-0.302512	8.75e-13	2.44e-12	down	CC294
GOCC_NUCLEAR_SPECK	MT1G	-0.306037	4.61e-13	1.31e-12	down	CC280
GOCC_PROTEIN_ACETYLTRANSFERASE_COMPLEX	MT1G	-0.309815	2.3e-13	6.62e-13	down	CC402
GOCC_ESC_E_Z_COMPLEX	MYH14	-0.304618	5.97e-13	1.68e-12	down	CC549
GOCC_NUCLEAR_SPECK	MYH14	-0.312412	1.41e-13	4.12e-13	down	CC280
GOCC_SEX_CHROMOSOME	MYH14	-0.331668	3.33e-15	1.06e-14	down	CC45
GOCC_ACTIN_CYTOSKELETON	NTRK2	0.406675	0	0	up	CC250
GOCC_ADHERENS_JUNCTION	NTRK2	0.430852	0	0	up	CC212
GOCC_CELL_CELL_CONTACT_ZONE	NTRK2	0.432548	0	0	up	CC645
GOCC_CELL_CELL_JUNCTION	NTRK2	0.400071	0	0	up	CC211
GOCC_EXOCYTIC_VESICLE	NTRK2	0.403289	0	0	up	CC732
GOCC_GLIAL_CELL_PROJECTION	NTRK2	0.443326	0	0	up	CC822
GOCC_GLYCOPROTEIN_COMPLEX	NTRK2	0.408339	0	0	up	CC800
GOCC_LEADING_EDGE_MEMBRANE	NTRK2	0.403495	0	0	up	CC406
GOCC_NEURON_PROJECTION_TERMINUS	NTRK2	0.400073	0	0	up	CC655
GOCC_NEURON_SPINE	NTRK2	0.439344	0	0	up	CC656
GOCC_NEURON_TO_NEURON_SYNAPSE	NTRK2	0.412272	0	0	up	CC906
GOCC_POSTSYNAPTIC_DENSITY_MEMBRANE	NTRK2	0.40709	0	0	up	CC888
GOCC_PRESYNAPSE	NTRK2	0.422741	0	0	up	CC875
GOCC_PRESYNAPTIC_ACTIVE_ZONE	NTRK2	0.459399	0	0	up	CC705
GOCC_PRESYNAPTIC_MEMBRANE	NTRK2	0.403757	0	0	up	CC611
GOCC_SARCOLEMMA	NTRK2	0.443991	0	0	up	CC588
GOCC_SARCOPLASM	NTRK2	0.415291	0	0	up	CC270
GOCC_SYNAPTIC_MEMBRANE	NTRK2	0.405852	0	0	up	CC805
GOCC_U6_SNRNP	NTRK2	-0.320967	2.75e-14	8.33e-14	down	CC128
GOCC_BRUSH_BORDER_MEMBRANE	PROM2	-0.311089	1.81e-13	5.25e-13	down	CC435
GOCC_EXOCYST	PROM2	-0.341284	4.44e-16	1.47e-15	down	CC8
GOCC_INTERMEDIATE_FILAMENT	PROM2	0.407028	0	0	up	CC200
GOCC_A_BAND	TRIB3	-0.304693	5.89e-13	1.66e-12	down	CC442
GOCC_APICAL_JUNCTION_COMPLEX	TRIB3	-0.337408	8.88e-16	2.9e-15	down	CC637
GOCC_CYTOPLASMIC_DYNEIN_COMPLEX	TRIB3	-0.308515	2.92e-13	8.37e-13	down	CC192
GOCC_DENDRITE_CYTOPLASM	TRIB3	-0.302459	8.83e-13	2.46e-12	down	CC495
GOCC_H3_HISTONE_ACETYLTRANSFERASE_COMPLEX	TRIB3	-0.343765	2.22e-16	7.48e-16	down	CC746
GOCC_INCLUSION_BODY	TRIB3	-0.321095	2.71e-14	8.2e-14	down	CC255
GOCC_NUCLEAR_INCLUSION_BODY	TRIB3	-0.319969	3.35e-14	1.01e-13	down	CC589
GOCC_POSTSYNAPTIC_ENDOSOME	TRIB3	-0.311088	1.81e-13	5.25e-13	down	CC891
GOCC_RECYCLING_ENDOSOME_MEMBRANE	TRIB3	-0.30947	2.45e-13	7.04e-13	down	CC710
GOCC_ROUGH_ENDOPLASMIC_RETICULUM	TRIB3	0.444437	0	0	up	CC159
GOCC_ROUGH_ENDOPLASMIC_RETICULUM_MEMBRANE	TRIB3	0.442841	0	0	up	CC358
GOCC_TRANSCRIPTIONALLY_ACTIVE_CHROMATIN	TRIB3	-0.31082	1.9e-13	5.51e-13	down	CC553
GOCC_VESICLE_TETHERING_COMPLEX	TRIB3	-0.319916	3.38e-14	1.02e-13	down	CC911
GOCC_WNT_SIGNALOSOME	TRIB3	-0.353662	0	0	down	CC995
GOCC_ANCHORED_COMPONENT_OF_SYNAPTIC_VESICLE_MEMBRANE	UCHL1	0.484276	0	0	up	CC909
GOCC_BRUSH_BORDER	UCHL1	-0.313201	1.22e-13	3.56e-13	down	CC209
GOCC_BRUSH_BORDER_MEMBRANE	UCHL1	-0.367823	0	0	down	CC435
GOCC_CATALYTIC_STEP_1_SPLICEOSOME	UCHL1	-0.363825	0	0	down	CC759
GOCC_EXOCYST	UCHL1	-0.440595	0	0	down	CC8
GOCC_EXON_EXON_JUNCTION_COMPLEX	UCHL1	-0.3033	7.59e-13	2.12e-12	down	CC551
GOCC_GOLGI_LUMEN	UCHL1	0.454836	0	0	up	CC163
GOCC_HIGH_DENSITY_LIPOPROTEIN_PARTICLE	UCHL1	0.405684	0	0	up	CC527
GOCC_INTERMEDIATE_FILAMENT	UCHL1	0.522887	0	0	up	CC200
GOCC_INTERMEDIATE_FILAMENT_CYTOSKELETON	UCHL1	0.439839	0	0	up	CC672
GOCC_NUCLEAR_SPECK	UCHL1	-0.388255	0	0	down	CC280
GOCC_PERICENTRIOLAR_MATERIAL	UCHL1	-0.306667	4.1e-13	1.17e-12	down	CC18
GOCC_PLATELET_DENSE_GRANULE_LUMEN	UCHL1	0.402535	0	0	up	CC381
GOCC_POST_MRNA_RELEASE_SPLICEOSOMAL_COMPLEX	UCHL1	-0.319985	3.33e-14	1e-13	down	CC761
GOCC_PROTON_TRANSPORTING_V_TYPE_ATPASE_V0_DOMAIN	UCHL1	0.427094	0	0	up	CC510
GOCC_SPECIFIC_GRANULE_LUMEN	UCHL1	0.412564	0	0	up	CC558
GOCC_TRANSCRIPTIONALLY_ACTIVE_CHROMATIN	UCHL1	-0.339491	6.66e-16	2.19e-15	down	CC553
GOCC_VESICLE_TETHERING_COMPLEX	UCHL1	-0.310811	1.91e-13	5.52e-13	down	CC911
