# Supplementary material for: A prognostic risk model for programmed cell death and revealing TRIB3 as a promising apoptosis suppressor in renal cell carcinoma
Source: Aging (Albany NY). 2023 Nov 22;15(22):13213–38. doi: 10.18632/aging.205237 (PMC10713411; doi:10.18632/aging.205237)
Supplement: Supplementary Table 5 [file aging-15-205237-s006.xlsx]

## Sheet: Sheet1
Supplementary Table 5. The correlations between 9 PRPCDGs and BP terms (PCC＞0.6|PCC＜-0.4, adj.P-value＜0.05).
Items	Genes	PCC	P-value	adj.P-value	Regualtion	No.
GOBP_AMINO_ACID_BETAINE_METABOLIC_PROCESS	PROM2	-0.409897	0	0	down	BP829
GOBP_AMINO_ACID_BETAINE_METABOLIC_PROCESS	UCHL1	-0.526088	0	0	down	BP829
GOBP_AMINOGLYCAN_BIOSYNTHETIC_PROCESS	DCN	0.636849	0	0	up	BP629
GOBP_AMINOGLYCAN_CATABOLIC_PROCESS	DCN	0.650103	0	0	up	BP630
GOBP_AMINOGLYCAN_METABOLIC_PROCESS	DCN	0.627904	0	0	up	BP628
GOBP_BIOMINERALIZATION	DCN	0.662503	0	0	up	BP6350
GOBP_BONE_MINERALIZATION	DCN	0.671077	0	0	up	BP2271
GOBP_CANONICAL_WNT_SIGNALING_PATHWAY	DCN	0.600469	0	0	up	BP4959
GOBP_CARNITINE_METABOLIC_PROCESS	PROM2	-0.41268	0	0	down	BP1370
GOBP_CARNITINE_METABOLIC_PROCESS	UCHL1	-0.537054	0	0	down	BP1370
GOBP_CARTILAGE_DEVELOPMENT	DCN	0.624071	0	0	up	BP4664
GOBP_CELL_PROLIFERATION_INVOLVED_IN_METANEPHROS_DEVELOPMENT	DCN	0.607907	0	0	up	BP5807
GOBP_CELLULAR_PROTEIN_CONTAINING_COMPLEX_LOCALIZATION	UCHL1	-0.453789	0	0	down	BP3007
GOBP_CELLULAR_RESPONSE_TO_CADMIUM_ION	MT1G	0.647002	0	0	up	BP5595
GOBP_CELLULAR_RESPONSE_TO_COPPER_ION	MT1G	0.68439	0	0	up	BP5597
GOBP_CELLULAR_RESPONSE_TO_CORTICOSTEROID_STIMULUS	ATP6V1C2	-0.407093	0	0	down	BP5627
GOBP_CELLULAR_RESPONSE_TO_DSRNA	UCHL1	-0.465474	0	0	down	BP5614
GOBP_CELLULAR_RESPONSE_TO_EXOGENOUS_DSRNA	UCHL1	-0.450827	0	0	down	BP5615
GOBP_CELLULAR_RESPONSE_TO_REACTIVE_OXYGEN_SPECIES	ATP6V1C2	-0.408174	0	0	down	BP3003
GOBP_CELLULAR_RESPONSE_TO_RETINOIC_ACID	DCN	0.664957	0	0	up	BP5604
GOBP_CELLULAR_RESPONSE_TO_SALT_STRESS	TRIB3	-0.425289	0	0	down	BP5654
GOBP_CELLULAR_RESPONSE_TO_VITAMIN	DCN	0.651702	0	0	up	BP5603
GOBP_CELLULAR_RESPONSE_TO_ZINC_ION	MT1G	0.69203	0	0	up	BP5602
GOBP_CHONDROCYTE_DEVELOPMENT	DCN	0.63729	0	0	up	BP261
GOBP_CHONDROCYTE_DIFFERENTIATION	DCN	0.637735	0	0	up	BP260
GOBP_CIRCADIAN_REGULATION_OF_GENE_EXPRESSION	UCHL1	-0.413209	0	0	down	BP2746
GOBP_COLLAGEN_CATABOLIC_PROCESS	DCN	0.645596	0	0	up	BP2308
GOBP_COLLAGEN_FIBRIL_ORGANIZATION	DCN	0.711992	0	0	up	BP2243
GOBP_COLLAGEN_METABOLIC_PROCESS	DCN	0.655405	0	0	up	BP2758
GOBP_DETOXIFICATION_OF_INORGANIC_COMPOUND	MT1G	0.775355	0	0	up	BP5335
GOBP_DORSAL_SPINAL_CORD_DEVELOPMENT	DCN	0.608573	0	0	up	BP2074
GOBP_ELASTIC_FIBER_ASSEMBLY	DCN	0.705656	0	0	up	BP4289
GOBP_EMBRYONIC_DIGESTIVE_TRACT_DEVELOPMENT	DCN	0.602091	0	0	up	BP4353
GOBP_EMBRYONIC_EYE_MORPHOGENESIS	DCN	0.61073	0	0	up	BP4258
GOBP_ENDODERM_FORMATION	DCN	0.611769	0	0	up	BP144
GOBP_ENDODERMAL_CELL_DIFFERENTIATION	DCN	0.622402	0	0	up	BP3230
GOBP_EPIDERMIS_MORPHOGENESIS	DCN	0.607745	0	0	up	BP4408
GOBP_EXTERNAL_ENCAPSULATING_STRUCTURE_ORGANIZATION	DCN	0.663375	0	0	up	BP3873
GOBP_EXTRACELLULAR_MATRIX_DISASSEMBLY	DCN	0.642352	0	0	up	BP2196
GOBP_EXTRACELLULAR_REGULATION_OF_SIGNAL_TRANSDUCTION	DCN	0.609282	0	0	up	BP6434
GOBP_EXTRACELLULAR_TRANSPORT	DCN	-0.424183	0	0	down	BP935
GOBP_FATTY_ACID_BETA_OXIDATION_USING_ACYL_COA_DEHYDROGENASE	DCN	-0.463343	0	0	down	BP2847
GOBP_FEMALE_SEX_DIFFERENTIATION	DCN	0.608176	0	0	up	BP4184
GOBP_G_PROTEIN_COUPLED_PURINERGIC_RECEPTOR_SIGNALING_PATHWAY	ATP6V1C2	-0.42726	0	0	down	BP3146
GOBP_GAP_JUNCTION_ASSEMBLY	ATP6V1C2	-0.431231	0	0	down	BP1900
GOBP_GLIAL_CELL_DERIVED_NEUROTROPHIC_FACTOR_RECEPTOR_SIGNALING_PATHWAY	DCN	0.618813	0	0	up	BP3199
GOBP_GOLGI_TO_PLASMA_MEMBRANE_PROTEIN_TRANSPORT	TRIB3	-0.402671	0	0	down	BP3548
GOBP_IMMATURE_B_CELL_DIFFERENTIATION	UCHL1	-0.415433	0	0	down	BP327
GOBP_INTRACILIARY_RETROGRADE_TRANSPORT	DCN	-0.465483	0	0	down	BP3168
GOBP_KERATAN_SULFATE_BIOSYNTHETIC_PROCESS	DCN	0.70308	0	0	up	BP1955
GOBP_KERATAN_SULFATE_CATABOLIC_PROCESS	DCN	0.737348	0	0	up	BP3431
GOBP_KERATAN_SULFATE_METABOLIC_PROCESS	DCN	0.667972	0	0	up	BP3430
GOBP_KIDNEY_MESENCHYME_DEVELOPMENT	DCN	0.637059	0	0	up	BP5775
GOBP_MACROPHAGE_APOPTOTIC_PROCESS	ATP6V0A4	-0.43062	0	0	down	BP5744
GOBP_MACROPHAGE_PROLIFERATION	ATP6V1C2	-0.422087	0	0	down	BP5315
GOBP_MESENCHYMAL_TO_EPITHELIAL_TRANSITION	DCN	0.600588	0	0	up	BP4995
GOBP_METANEPHRIC_MESENCHYME_DEVELOPMENT	DCN	0.643723	0	0	up	BP5776
GOBP_METHIONINE_BIOSYNTHETIC_PROCESS	UCHL1	-0.461876	0	0	down	BP1265
GOBP_MITOCHONDRIAL_PROTEIN_PROCESSING	DCN	-0.416342	0	0	down	BP3038
GOBP_MORPHOGENESIS_OF_AN_EPITHELIAL_BUD	DCN	0.638456	0	0	up	BP5132
GOBP_MUCOPOLYSACCHARIDE_METABOLIC_PROCESS	DCN	0.633881	0	0	up	BP6866
GOBP_MUSCLE_ATROPHY	UCHL1	-0.472058	0	0	down	BP1760
GOBP_NEGATIVE_REGULATION_OF_AMINE_TRANSPORT	DCN	0.630864	0	0	up	BP4853
GOBP_NEGATIVE_REGULATION_OF_AMINO_ACID_TRANSPORT	DCN	0.627666	0	0	up	BP4856
GOBP_NEGATIVE_REGULATION_OF_CARDIAC_MUSCLE_CELL_DIFFERENTIATION	TRIB3	-0.40365	0	0	down	BP7388
GOBP_NEGATIVE_REGULATION_OF_CARTILAGE_DEVELOPMENT	DCN	0.661617	0	0	up	BP5240
GOBP_NEGATIVE_REGULATION_OF_CHONDROCYTE_DIFFERENTIATION	DCN	0.676176	0	0	up	BP2573
GOBP_NEGATIVE_REGULATION_OF_COLD_INDUCED_THERMOGENESIS	UCHL1	-0.410575	0	0	down	BP6360
GOBP_NEGATIVE_REGULATION_OF_HEMATOPOIETIC_PROGENITOR_CELL_DIFFERENTIATION	UCHL1	-0.474177	0	0	down	BP6547
GOBP_NEGATIVE_REGULATION_OF_ORGANIC_ACID_TRANSPORT	DCN	0.674761	0	0	up	BP2738
GOBP_NEGATIVE_REGULATION_OF_PLATELET_DERIVED_GROWTH_FACTOR_RECEPTOR_SIGNALING_PATHWAY	DCN	0.601167	0	0	up	BP1541
GOBP_NEGATIVE_REGULATION_OF_VASCULAR_ENDOTHELIAL_CELL_PROLIFERATION	UCHL1	-0.42849	0	0	down	BP7147
GOBP_ODONTOGENESIS	DCN	0.603833	0	0	up	BP3466
GOBP_OSSIFICATION	DCN	0.616797	0	0	up	BP108
GOBP_OVULATION_CYCLE	DCN	0.680455	0	0	up	BP3499
GOBP_OVULATION_CYCLE_PROCESS	DCN	0.64574	0	0	up	BP2187
GOBP_PEPTIDE_CROSS_LINKING	DCN	0.612096	0	0	up	BP1956
GOBP_PHOSPHATIDYLINOSITOL_DEPHOSPHORYLATION	TRIB3	-0.40733	0	0	down	BP4218
GOBP_PHOSPHOLIPID_DEPHOSPHORYLATION	TRIB3	-0.426509	0	0	down	BP4213
GOBP_POSITIVE_REGULATION_OF_BIOMINERALIZATION	DCN	0.600293	0	0	up	BP6353
GOBP_POSITIVE_REGULATION_OF_BONE_MINERALIZATION	DCN	0.61649	0	0	up	BP2294
GOBP_POSITIVE_REGULATION_OF_ENDOTHELIAL_CELL_APOPTOTIC_PROCESS	ATP6V1C2	-0.442943	0	0	down	BP7311
GOBP_POSITIVE_REGULATION_OF_KERATINOCYTE_PROLIFERATION	DCN	0.701627	0	0	up	BP1625
GOBP_POSITIVE_REGULATION_OF_NON_CANONICAL_WNT_SIGNALING_PATHWAY	DCN	0.610702	0	0	up	BP7243
GOBP_POSITIVE_REGULATION_OF_SIGNAL_TRANSDUCTION_BY_P53_CLASS_MEDIATOR	MYH14	-0.412181	0	0	down	BP6600
GOBP_PROSTATE_GLAND_DEVELOPMENT	DCN	0.636487	0	0	up	BP2327
GOBP_PROSTATE_GLAND_MORPHOGENESIS	DCN	0.610798	0	0	up	BP5112
GOBP_PROSTATIC_BUD_FORMATION	DCN	0.642082	0	0	up	BP5113
GOBP_REGULATION_OF_ANIMAL_ORGAN_FORMATION	DCN	0.610344	0	0	up	BP534
GOBP_REGULATION_OF_ANIMAL_ORGAN_MORPHOGENESIS	DCN	0.635359	0	0	up	BP7234
GOBP_REGULATION_OF_BIOMINERALIZATION	DCN	0.621961	0	0	up	BP6351
GOBP_REGULATION_OF_BONE_MINERALIZATION	DCN	0.66064	0	0	up	BP2293
GOBP_REGULATION_OF_CHONDROCYTE_DIFFERENTIATION	DCN	0.606103	0	0	up	BP2572
GOBP_REGULATION_OF_DEACETYLASE_ACTIVITY	UCHL1	-0.436032	0	0	down	BP6393
GOBP_REGULATION_OF_DENDRITIC_CELL_DIFFERENTIATION	ATP6V0A4	-0.403473	0	0	down	BP7445
GOBP_REGULATION_OF_KIDNEY_DEVELOPMENT	DCN	0.667699	0	0	up	BP5997
GOBP_REGULATION_OF_MORPHOGENESIS_OF_AN_EPITHELIUM	DCN	0.686337	0	0	up	BP7124
GOBP_REGULATION_OF_NON_CANONICAL_WNT_SIGNALING_PATHWAY	DCN	0.639198	0	0	up	BP7241
GOBP_REGULATION_OF_WNT_SIGNALING_PATHWAY_PLANAR_CELL_POLARITY_PATHWAY	DCN	0.602585	0	0	up	BP7248
GOBP_RESPONSE_TO_COPPER_ION	MT1G	0.676129	0	0	up	BP4190
GOBP_RESPONSE_TO_CORTICOSTEROID	ATP6V1C2	-0.412232	0	0	down	BP2489
GOBP_RESPONSE_TO_DEXAMETHASONE	ATP6V1C2	-0.423044	0	0	down	BP5678
GOBP_RESPONSE_TO_LEPTIN	ATP6V1C2	-0.402567	0	0	down	BP3765
GOBP_RESPONSE_TO_UV_C	ATP6V0A4	-0.402733	0	0	down	BP1456
GOBP_RESPONSE_TO_ZINC_ION	MT1G	0.623642	0	0	up	BP1445
GOBP_SALIVARY_GLAND_DEVELOPMENT	DCN	0.603259	0	0	up	BP1138
GOBP_SEQUESTERING_OF_EXTRACELLULAR_LIGAND_FROM_RECEPTOR	DCN	0.679153	0	0	up	BP3144
GOBP_SODIUM_INDEPENDENT_ORGANIC_ANION_TRANSPORT	ATP6V1C2	-0.430202	0	0	down	BP3589
GOBP_SPERM_AXONEME_ASSEMBLY	DCN	-0.431244	0	0	down	BP1113
GOBP_STRESS_RESPONSE_TO_METAL_ION	MT1G	0.761187	0	0	up	BP6177
GOBP_STRIATED_MUSCLE_CELL_DEVELOPMENT	DCN	0.606755	0	0	up	BP4890
GOBP_SURFACTANT_HOMEOSTASIS	ATP6V1C2	-0.430078	0	0	down	BP3574
GOBP_TISSUE_REGENERATION	DCN	0.635297	0	0	up	BP3411
GOBP_TOLL_LIKE_RECEPTOR_3_SIGNALING_PATHWAY	ATP6V1C2	-0.427388	0	0	down	BP2916
GOBP_TRABECULA_FORMATION	DCN	0.616748	0	0	up	BP5039
GOBP_TRANSFORMING_GROWTH_FACTOR_BETA1_PRODUCTION	DCN	0.641534	0	0	up	BP2741
GOBP_TUBULIN_DEACETYLATION	UCHL1	-0.431194	0	0	down	BP5947
GOBP_URATE_METABOLIC_PROCESS	PROM2	-0.437056	0	0	down	BP4120
GOBP_URATE_METABOLIC_PROCESS	UCHL1	-0.506648	0	0	down	BP4120
GOBP_VESICLE_MEDIATED_TRANSPORT_TO_THE_PLASMA_MEMBRANE	TRIB3	-0.413376	0	0	down	BP6248
GOBP_ZINC_ION_HOMEOSTASIS	MT1G	0.646253	0	0	up	BP4904
